# Supplementary material
Source: ML conference proceedings conference paper supplement (https://www.ecva.net/papers/eccv_2022/papers_ECCV/html/136840663_ECCV_2022_paper.php)
Supplement: Supplementary file 1 [file 136840663-supp.pdf]

# Supplementary Materials: A Fast Knowledge Distillation Framework for Visual Recognition

Zhiqiang Shen<sup>1,2,3</sup> and Eric Xing<sup>1,3</sup>

<sup>1</sup> Carnegie Mellon University, Pittsburgh, USA

<sup>2</sup> Hong Kong University of Science and Technology, Hong Kong, China

<sup>3</sup> Mohamed bin Zayed University of Artificial Intelligence, Abu Dhabi, UAE

zhiqiangshen@cse.ust.hk, epxing@cs.cmu.edu

Project Page: <http://zhiqiangshen.com/projects/FKD/index.html>

## Appendix

### A Visualization, Analysis and Discussion

To investigate the learned differences of information between ReLabel and FKD, we depict the intermediate attention maps using gradient-based localization [3]. There are three important observations that align our aforementioned analyses in Fig. 1 and 2.

(i) FKD’s predictions are less confident than ReLabel with more surrounding context; This is reasonable since in random-crop training, many crops are basically backgrounds (context), the soft predicted label from the teacher model might be completely different from the ground-truth one-hot label and the training mechanism of FKD can leverage the additional information from context.

(ii) FKD’s attention maps have a larger active area on the object regions, which indicates that FKD trained model utilizes more cues for prediction and also captures more subtle and fine-grained information. However, it is interesting to see that the *guided backprop* is more focused than ReLabel.

(iii) ReLabel’s attention is more aligned with PyTorch pre-trained model, while FKD’s results are substantially unique to them. It implies that FKD’s learned attention differs significantly from one-hot and global label map learned models.

### B Training Details and Experimental Settings

**Training details for Table 3 of the main text.** We employ the training settings and hyper-parameters following Table 1, which are the same as ReLabel. We use 4 as the number of crops in each image during training.

**Training details for Table 5 of the main text.** When comparing our FKD with ViT [1]/DeiT [6]/SReT [4] (Table 5 of the main text), we employ the training settings and hyper-parameters following Table 2.

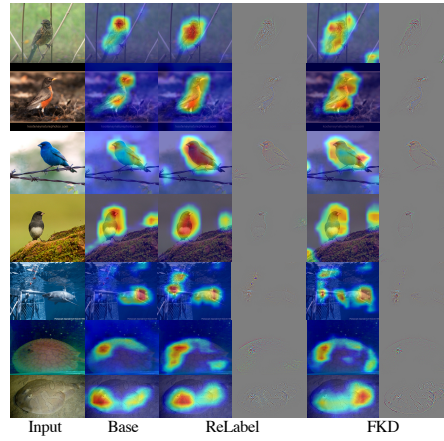

**Fig. 1.** Visualization of learned attention map using GradCAM [3,2]. “Base” indicates the pre-trained PyTorch model. In each group of ReLabel and FKD, left is *Grad-CAM* and right is *Guided Backprop*.

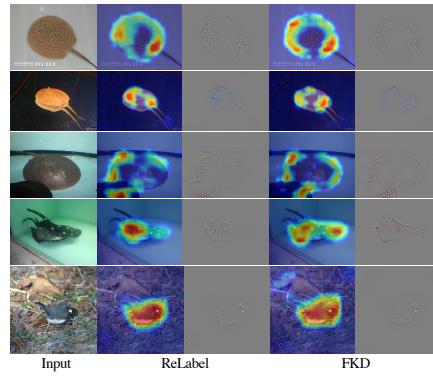

**Fig. 2.** More visualization of response/attention maps.

**Training details for Table 8 of the main text.** The training settings and hyper-parameters of FKD with FBNet-C100 [7] and EfficientNetv2-B0 [5] backbones (Table 8 of the main text) are provided in Table 2 which are the same as the training protocol on ViT, DeiT and SReT. We use 4 as the number of crops in each image during training.

**Table 1.** Training hyper-parameters and details for ReLabel [8] and FKD used in Table 3 of the main text.

| Method          | ReLabel [8] or FKD     |
|-----------------|------------------------|
| Teacher         | EfficientNet-L2-ns-475 |
| Epoch           | 300                    |
| Batch size      | 1,024                  |
| Optimizer       | SGD                    |
| Init. $lr$      | 0.1                    |
| $lr$ scheduler  | cosine                 |
| Weight decay    | 1e-4                   |
| Random crop     | Yes                    |
| Flipping        | Yes                    |
| Warmup epochs   | 5                      |
| Color jittering | Yes                    |

**Table 2.** Training hyper-parameters and details for the comparison in Table 5 of the main text when employing ViT [1], DeiT [6] and SReT [4] as the backbone networks. Table is adapted from [6].

| Method          | ViT-B [1] | DeiT [6]/SReT [4] | FKD    |
|-----------------|-----------|-------------------|--------|
| Epoch           | 300       | 300               | 300    |
| Batch size      | 4096      | 1024              | 1024   |
| Optimizer       | AdamW     | AdamW             | AdamW  |
| Init. $lr$      | 0.003     | 0.001             | 0.002  |
| $lr$ scheduler  | cosine    | cosine            | cosine |
| Weight decay    | 0.3       | 0.05              | 0.05   |
| Warmup epochs   | 3.4       | 5                 | 5      |
| Label smoothing | None      | 0.1               | None   |
| Dropout         | 0.1       | None              | None   |
| Stoch. Depth    | None      | 0.1               | 0.1    |
| Repeated Aug    | None      | Yes               | None   |
| Gradient Clip.  | Yes       | None              | None   |
| Rand Augment    | None      | 9/0.5             | None   |
| Mixup prob.     | None      | 0.8               | None   |
| Cutmix prob.    | None      | 1.0               | None   |
| Erasing prob.   | None      | 0.25              | None   |

## References

1. Dosovitskiy, A., Beyer, L., Kolesnikov, A., Weissenborn, D., Zhai, X., Unterthiner, T., Dehghani, M., Minderer, M., Heigold, G., Gelly, S., et al.: An image is worth 16x16 words: Transformers for image recognition at scale. In: International Conference on Learning Representations (2020) [1](#), [3](#)
2. Gildenblat, J., contributors: Pytorch library for cam methods. <https://github.com/jacobgil/pytorch-grad-cam> (2021) [2](#)
3. Selvaraju, R.R., Cogswell, M., Das, A., Vedantam, R., Parikh, D., Batra, D.: Grad-cam: Visual explanations from deep networks via gradient-based localization. In: ICCV (2017) [1](#), [2](#)
4. Shen, Z., Liu, Z., Xing, E.: Sliced recursive transformer. arXiv preprint arXiv: 2111.05297 (2021) [1](#), [3](#)
5. Tan, M., Le, Q.: Efficientnetv2: Smaller models and faster training. In: International Conference on Machine Learning. pp. 10096–10106. PMLR (2021) [1](#)
6. Touvron, H., Cord, M., Douze, M., Massa, F., Sablayrolles, A., Jégou, H.: Training data-efficient image transformers & distillation through attention. In: International Conference on Machine Learning. pp. 10347–10357. PMLR (2021) [1](#), [3](#)
7. Wu, B., Dai, X., Zhang, P., Wang, Y., Sun, F., Wu, Y., Tian, Y., Vajda, P., Jia, Y., Keutzer, K.: Fbnet: Hardware-aware efficient convnet design via differentiable neural architecture search. In: Proceedings of the IEEE/CVF Conference on Computer Vision and Pattern Recognition. pp. 10734–10742 (2019) [1](#)
8. Yun, S., Oh, S.J., Heo, B., Han, D., Choe, J., Chun, S.: Re-labeling imagenet: from single to multi-labels, from global to localized labels. In: Proceedings of the IEEE/CVF Conference on Computer Vision and Pattern Recognition. pp. 2340–2350 (2021) [3](#)
